# Supplementary material for: Transcriptomic Analysis of the Effect of Pruning on Growth, Quality, and Yield of Wuyi Rock Tea
Source: MDPI journal article supplement (doi:10.3390/plants12203625), 2023-10-20
Supplement: s1 [file s1]

## Supplementary Materials

**Table S1 Overview of transcriptomic sequencing in tea leaves**

| Sample        | Raw Reads | Raw bases | Clean Reads | Clean Base(G) | Error Rate(%) |
|---------------|-----------|-----------|-------------|---------------|---------------|
| MC-1          | 43512646  | 6.52      | 42172184    | 6.33          | 0.03          |
| MC-2          | 41245880  | 6.18      | 40066860    | 6.01          | 0.03          |
| MC-3          | 43004222  | 6.45      | 41740838    | 6.26          | 0.03          |
| MP-1          | 38908256  | 5.83      | 37648946    | 5.65          | 0.03          |
| MP-2          | 40024568  | 6.00      | 39034110    | 5.86          | 0.03          |
| MP-3          | 44819000  | 6.72      | 43317594    | 6.50          | 0.03          |
| Total/Average | 251514572 | 6.28      | 243980532   | 6.10          | 0.03          |

Note: MC: Tea tree unpruned; MP: Tea tree pruned

**Table S2 Efficiency statistics of transcriptome data compared with reference genomes**

| Sample | Total reads | Total mapped      | Multiple mapped | Uniquely mapped   | Read-1 mapped     | Read-2 mapped     | Reads map to '+'  | Reads map to '-'  |
|--------|-------------|-------------------|-----------------|-------------------|-------------------|-------------------|-------------------|-------------------|
| MC-1   | 42172184    | 39770212 (94.3%)  | 2985238 (7.08%) | 36784974 (87.23%) | 18392487 (43.61%) | 18392487 (43.61%) | 18392487 (43.61%) | 18392487 (43.61%) |
| MC-2   | 40066860    | 37828644 (94.41%) | 2856432 (7.13%) | 34972212 (87.28%) | 17486106 (43.64%) | 17486106 (43.64%) | 17486106 (43.64%) | 17486106 (43.64%) |
| MC-3   | 41740838    | 39367906 (94.32%) | 2996280 (7.18%) | 36371626 (87.14%) | 18185813 (43.57%) | 18185813 (43.57%) | 18185813 (43.57%) | 18185813 (43.57%) |
| MP-1   | 37648946    | 35519428 (94.34%) | 2681390 (7.12%) | 32838038 (87.22%) | 16419019 (43.61%) | 16419019 (43.61%) | 16419019 (43.61%) | 16419019 (43.61%) |
| MP-2   | 39034110    | 36804738 (94.29%) | 2656414 (6.81%) | 34148324 (87.48%) | 17074162 (43.74%) | 17074162 (43.74%) | 17074162 (43.74%) | 17074162 (43.74%) |
| MP-3   | 43317594    | 40750932 (94.07%) | 3029678 (6.99%) | 37721254 (87.08%) | 18860627 (43.54%) | 18860627 (43.54%) | 18860627 (43.54%) | 18860627 (43.54%) |

Note: MC: Tea plant unpruned; MP: Tea plant pruned; The reference genome was GCF\_004153795.1\_AHAU\_CSS\_1\_genomic.fna.gz. Download address: [https://ftp.ncbi.nlm.nih.gov/genomes/all/GCF/004/153/795/GCF\\_004153795.1\\_AHAU\\_CSS\\_1/](https://ftp.ncbi.nlm.nih.gov/genomes/all/GCF/004/153/795/GCF_004153795.1_AHAU_CSS_1/); **Total Reads**: Total number of clean reads; **Total mapped**: The number of reads compared to the reference genome; **Multi mapped**: The number of reads multiple compared to the reference genome; **Unique mapped**: The number of reads only compared to the reference genome; **Read-1 mapped**: Number of successes comparison in read1; **Read-2 mapped**: Number of successes comparison in read2; **Reads map to '+'**: Number of reads successfully comparison on the positive chain of the genome; **Reads map to '-'**: Number of reads successfully comparison on the negative chain of the genome.

**Table S3 Analysis of the growth and quality indicator of tea plant**

| Index            |                              | MC          | MP          | Adjusted<br><i>p</i> -value |
|------------------|------------------------------|-------------|-------------|-----------------------------|
| Growth<br>index  | Leaf area (cm <sup>2</sup> ) | 21.64±0.48  | 28.77±0.30  | < 0.05                      |
|                  | Hundred-bud weight (g)       | 107.90±2.23 | 151.70±5.71 | < 0.05                      |
|                  | Chlorophyll content (SPAD)   | 35.37±0.32  | 38.10±0.69  | < 0.05                      |
|                  | Yield (kg/ha)                | 189.33±4.04 | 350.00±3.00 | < 0.05                      |
| Quality<br>index | Tea polyphenol (mg/g)        | 15.84±0.36  | 16.33±0.42  | 0.19                        |
|                  | Theanine (mg/g)              | 1.29± 0.02  | 1.31±0.02   | 0.35                        |
|                  | Caffeine (mg/g)              | 2.99± 0.03  | 2.78±0.05   | < 0.05                      |
|                  | Flavone (mg/g)               | 1.11± 0.01  | 0.97±0.02   | < 0.05                      |
|                  | Free amino acid (mg/g)       | 4.25± 0.05  | 2.96±0.12   | < 0.05                      |
|                  | Soluble sugar (mg/g)         | 3.46± 0.02  | 3.66±0.04   | < 0.05                      |

Note: MC: Tea plant unpruned; MP: Tea plant pruned.

**Table S4 The basic conditions of tea plantation during the experiment**

|                | Maximum<br>temperature<br>(°C) | Minimum<br>temperature<br>(°C) | Mean<br>temperature<br>(°C) | Number of<br>sunny days<br>(Day) | Precipitation<br>days<br>(Day) | Amount of<br>precipitation<br>(mm) | Relative<br>humidity<br>(%) | Pest and disease control                                                                                                                                                                                                                                                                                                |
|----------------|--------------------------------|--------------------------------|-----------------------------|----------------------------------|--------------------------------|------------------------------------|-----------------------------|-------------------------------------------------------------------------------------------------------------------------------------------------------------------------------------------------------------------------------------------------------------------------------------------------------------------------|
| August 2021    | 35                             | 23                             | 27.7                        | 13                               | 18                             | 194.5                              | 79                          | The pest and disease control in tea plantation was based on organic pesticides, the main organic pesticides used were matrine and azadirachtin, each organic pesticide was used three times a year in March, September and October, two organic pesticides were used alternately, and the use time interval of 10 days. |
| September 2021 | 36                             | 20                             | 27.4                        | 21                               | 9                              | 13.6                               | 71                          |                                                                                                                                                                                                                                                                                                                         |
| October 2021   | 33                             | 11                             | 20.9                        | 17                               | 14                             | 35.6                               | 73                          |                                                                                                                                                                                                                                                                                                                         |
| November 2021  | 23                             | 3                              | 14                          | 18                               | 12                             | 77.3                               | 76                          |                                                                                                                                                                                                                                                                                                                         |
| December 2021  | 20                             | 2                              | 10                          | 22                               | 9                              | 32.7                               | 71                          |                                                                                                                                                                                                                                                                                                                         |
| January 2022   | 20                             | 1                              | 9.7                         | 14                               | 17                             | 54.2                               | 80                          |                                                                                                                                                                                                                                                                                                                         |
| February 2022  | 23                             | 1                              | 7.6                         | 10                               | 18                             | 151                                | 82                          |                                                                                                                                                                                                                                                                                                                         |
| March 2022     | 27                             | 3                              | 16.1                        | 13                               | 18                             | 309.9                              | 79                          |                                                                                                                                                                                                                                                                                                                         |
| April 2022     | 33                             | 6                              | 18                          | 13                               | 17                             | 112.6                              | 74                          |                                                                                                                                                                                                                                                                                                                         |
